# Supplementary material
Source: PubMed Central journal article supplement (PMC7769922)
Supplement: NIHMS1644595-supplement-Supplemental_Material.pdf [file NIHMS1644595-supplement-Supplemental_Material.pdf]

# SUPPLEMENTAL MATERIAL

## Development of an Electronic Phenotyping Algorithm for Cardioembolic Stroke

### Table of Contents

|                                                                                                     |           |
|-----------------------------------------------------------------------------------------------------|-----------|
| <b>SUPPLEMENTAL METHODS</b> .....                                                                   | <b>2</b>  |
| Mass General Brigham Biobank .....                                                                  | 2         |
| Algorithm for Ascertaining Stroke Events .....                                                      | 2         |
| Data Preparation for NLP Algorithm Development.....                                                 | 2         |
| NLP Algorithm Development .....                                                                     | 3         |
| Example: NLP Algorithm for Akinetic Left Ventricular Segment .....                                  | 5         |
| Example: NLP Algorithm for Delayed Left Atrial Appendage Emptying Velocity .....                    | 5         |
| Example: NLP Algorithm for Left Ventricular Ejection Fraction .....                                 | 5         |
| <b>SUPPLEMENTAL TABLES</b> .....                                                                    | <b>6</b>  |
| Table I. Modified cardioembolic stroke TOAST features.....                                          | 6         |
| Table II. ICD codes and procedure codes for algorithm dictionary .....                              | 8         |
| Table III. Initial and final search criteria for each echo report feature.....                      | 16        |
| Table IV. Descriptive summary of algorithms of NLP-based TOAST-based features.....                  | 18        |
| Table V. Summary of echocardiograms among patients in MGH Stroke Registry .....                     | 19        |
| Table VI. Different formats for reporting positive cases of delayed emptying velocity.....          | 21        |
| Table VII. Different formats for reporting negative cases of delayed emptying velocity.....         | 22        |
| Table VIII. Multivariable logistic regression model applied to MGH Stroke Registry .....            | 23        |
| Table IX. Random forest model performance under inclusion of PFO compared to exclusion of PFO ..... | 24        |
| <b>SUPPLEMENTAL FIGURES</b> .....                                                                   | <b>25</b> |
| Figure I. Process for feature extraction by identifying rules and regular expressions. ....         | 25        |
| Figure II. Example R script for finding common long phrases containing search term.....             | 27        |
| Figure III. Left ventricular ejection fraction (LVEF) regular expressions algorithm. ....           | 30        |
| Figure IV. Total number of cardioembolic stroke features per patient. ....                          | 31        |
| Figure V. Correlation plot of cardioembolic features. ....                                          | 32        |

## **SUPPLEMENTAL METHODS**

### **Mass General Brigham Biobank**

For developing the feature extraction algorithms of features based on free text cardiology reports, we collected EHR data from a subset of 30,716 individuals in the Mass General Brigham Biobank as of December 2018 using the Research Patient Database Repository (RPDR). The subjects included in this analysis were a convenience sample comprising individuals with available genomic data, though genomic data were not utilized in this analysis.

### **Algorithm for Ascertaining Stroke Events**

A combination of ICD9 and ICD10 codes were used to ascertain stroke events for patients missing stroke dates in the Massachusetts General Hospital and Brigham and Women's Hospital prospective ischemic stroke registry. The list of ICD9 stroke codes used were 433.01, 433.11, 433.21, 433.31, 433.81, 433.91, 434.01, 434.11, and 434.91. The list of ICD10 stroke codes used were I63.00, I63.011, I63.012, I63.019, I63.02, I63.031, I63.032, I63.033, I63.039, I63.09, I63.10, I63.111, I63.112, I63.113, I63.119, I63.12, I63.131, I63.132, I63.133, I63.139, I63.19, I63.20, I63.211, I63.212, I63.219, I63.22, I63.231, I63.232, I63.233, I63.239, I63.29, I63.30, I63.311, I63.312, I63.319, I63.321, I63.322, I63.323, I63.329, I63.331, I63.332, I63.339, I63.341, I63.342, I63.343, I63.349, I63.39, I63.40, I63.411, I63.412, I63.413, I63.419, I63.421, I63.422, I63.423, I63.429, I63.431, I63.432, I63.433, I63.439, I63.441, I63.442, I63.443, I63.449, I63.49, I63.50, I63.511, I63.512, I63.513, I63.519, I63.521, I63.522, I63.523, I63.529, I63.531, I63.532, I63.539, I63.541, I63.542, I63.543, I63.549, I63.59, I63.6, I63.8, and I63.9.

### **Data Preparation for NLP Algorithm Development**

We obtained free-form text notes from cardiology reports, including echocardiogram reports, in the EHR using RPDR. We pre-processed them to make them usable for natural language processing (NLP). First, we removed language abnormalities from the cardiology reports. Specifically, we lowercased the text, replaced single underscores with a space, removed two consecutive hyphens (to remove excessive hyphens while preserving negative signs), added a space after a colon, added a space after a semi-colon, added a space after a comma, replaced multiple consecutive question marks with one question mark, expanded contractions common in the English-language, and removed single apostrophes followed by an "s". Cardiology reports tend to have designated sections with several headings. Sometimes, headings were capitalized, so lowercasing the text could risk losing the possibility of finding specific search terms under a specified report section. Similarly, excessive whitespaces were not removed since multiple whitespaces could be used to delineate separate sections in cardiology reports. Stop words could have been removed, but removal substantially increased pre-processing run-time. In addition, stop words proved useful for manually reviewing reports, which included ambivalent language. Punctuation marks could have also been removed but were chosen to remain since sentence units had to be preserved for identifying specific search terms in individual sentences. After performing these pre-processing steps, we finally attained a clean corpus for data analysis.

## NLP Algorithm Development

We developed NLP regular expressions algorithms for 11 cardioembolic stroke features (**Figure I**). Features included mitral stenosis, left atrial appendage thrombus, left ventricular thrombus, akinetic left ventricular segment, mitral valve prolapse, mitral annulus calcification, left atrial turbulence, delayed emptying velocity, atrial septal aneurysm, patent foramen ovale, and hypokinetic left ventricular segment. Algorithms and test characteristics for identification of each feature are summarized in **Table IV**.

Each NLP regular expressions algorithm (except for delayed emptying velocity and hypokinetic left ventricular segment) consisted of three types of rules: neutral rules, positive rules, and negation rules. First, strings matching the neutral rules were removed since their presence do not indicate whether the feature was present nor absent. For example, phrases containing the feature and “reason” were removed since physicians will often list the reasons behind the administration of a cardiology report at the heading of a cardiology report. Similarly, phrases containing the feature and one of the words: “eval” for evaluate, “exclude”, “assess”, “rule out”, “r/o” for rule out, “icd-”, and “diagnosis”, were removed from the cardiology report. Second, cases of cardiology reports matching the positive rules were positively flagged for the feature. Third, cases of cardiology reports matching the negative rules will have their positive flags removed. After applying neutral, positive, and negation regular expression rules, we finally attained the covariates based on NLP regular expressions algorithms.

We developed a procedure for developing regular expressions rules. First, for each feature, a cardiology domain expert defined the search criteria for a feature: including search terms to search for and optionally, specific report locations to search in. Second, we searched for phrases which included those search terms in the cleaned corpus of cardiology reports using R packages ‘quanteda’ and ‘corpus’. Third, after identifying the most common phrases including those search terms, regular expressions were written to match patterns in those common phrases and these regular expressions were used to define the positive rules and negation rules. Fourth, we reiteratively applied the regular expressions to cardiology reports and manually reviewed them for additional search terms and regular expressions to improve and develop additional neutral, positive, and negation rules. In this way, the NLP regular expressions algorithms were reiteratively revised to achieve a positive predictive value of  $\geq 80\%$  based on chart reviews for samples of 50 reports.

For the second step in the procedure for developing regular expressions rules, we developed a process for searching common phrases, which include specified search terms. First, R package `quanteda` `tokens()` function was used to tokenize the corpus into unigrams with the symbols removed and separators removed. Second, `quanteda` `kwic()` function was used to locate keywords in context by identifying an n-sized window of words around the search term. Third, data manipulation using R package `dplyr` was applied to filter for (or against) specific words before and/or after the search term to identify desirable phrases indicating the presence of the cardioembolic stroke feature. Fourth, R package `corpus` `term_stats()` function was applied to tabulate a frequency table for counting the occurrence of phrases of length n (n-grams) containing the search term, for phrases that occur at least 2 times. Since it was uncertain as to how long a phrase of words should be for capturing a feature, we tested the n-gram phrase length from 1 to 40 and counted the resulting number of phrases generated from each length. From this testing, a plot of the length of the phrases against the number of resulting phrases was generated. If the phrase length was 1, we would yield only a few (e.g. 1-2) results, which consist of a single

word containing the search term. As the phrase length increased, the number of phrases including the search term increased. We searched for long phrases containing the search term since longer phrases were more informative for indicating the presence or absence of the feature. However, if the phrase length containing the search term was too high, the number of phrases including the search term started to decrease, because the phrase was too long and thus too unique. So, the frequency counts for these long phrases drop to 1 and do not meet the minimum count criteria of occurring at least 2 times. To allow for flexibility and add robustness, a range of n-gram length was chosen based on and around the peak of the graph in the plot (e.g. from 8 to 13 since peak was at 11). Fifth, R package `corpus term_stats()` function was applied again, now using the chosen range of n-gram length for tabulating the frequency of long phrases containing the search term. Sixth, since some phrases commonly occurred, usually with the same first 2 words, albeit with slight variation in their diction (e.g. “there is no evidence of left ventricular thrombus” vs. “there is no obvious evidence of left ventricular thrombus”), the length of phrases could be computed for each phrase and the phrases could be grouped by the concatenation of the first 2 words in each phrase. Then the longest phrase within each group was computed. Representative, long phrases were tabulated in descending count order to display the most common and informative phrases containing the search terms. These representative, long phrases were then analyzed for regular expressions that would capture the presence or absence of a cardioembolic stroke feature.

### ***Example: NLP Algorithm for Akinetic Left Ventricular Segment***

The NLP regular expressions algorithm for akinetic left ventricular segment required identification of specific sections in the echocardiogram report. First, we removed phrases satisfying the neutral rules in the cleaned corpus. Second, we identified cases that contain one of the search terms. Third, we separated the report into sentences by applying R package tokenizers function `tokenize_sentences()` onto the original corpus text before pre-processing since the pre-processed corpus did not retain enough information (e.g. whitespaces, punctuation marks) for facile sentence tokenization. R package tokenizers function `tokenize_sentences()` was used since splitting text into sentences based on periods did not always work as periods were also used as decimal points. Fourth, we searched for sentences containing the desired cardiology report section heading (e.g. “left ventr”). Fifth, we searched for sentences containing the desired search term (e.g. “akine” and “dyskine”) and applied negation rules for the search term. Sixth, we found the location of all of the other report section headings, such as “venous”, “pulmonic valve”, “pericardium”, “interatrial septum”, “conclusions”, “dyssynchrony”, “pericardial disease”, “pulmonary valve”, “right ventr”, “interventricular septum”, “left atrium”, “right atrium”, “tricuspid valve”, “aortic valve”, “mitral valve”, “interatrial septum”, and “report\_end”. This list of report section headings was constructed based on experience from reiteratively refining the algorithm. Finally, we identified positive cases of when the search term was between the desired section heading and another section heading. Additional effort was required to identify the search terms under specific report sections, because the search terms could also appear under other report sections.

### ***Example: NLP Algorithm for Delayed Left Atrial Appendage Emptying Velocity***

The NLP regular expressions algorithm for delayed emptying velocity was challenging since this feature could be reported in different formats, either as a number, a range of numbers, or as a qualitative description. From applying R code like that of **Figure II**, phrases containing “velocity” were extracted. Manual examination of the phrases showed that there were various formats used to express the positive cases of delayed emptying velocity (Table VI) and the negative cases of delayed emptying velocity (Table VII). These different formats guided the development of an NLP algorithm through a combination of if/else logic and regular expressions.

### ***Example: NLP Algorithm for Left Ventricular Ejection Fraction***

Extracted left ventricular ejection fraction quantities less than or equal to 40 were considered to qualify for the hypokinetic left ventricular segment feature. The transthoracic echocardiogram reports and transesophageal echocardiogram reports from MGH and BWH were analyzed for developing regular expression-based algorithms for extracting left ventricular ejection fraction (**Figure III**).

## SUPPLEMENTAL TABLES

**Table I. Modified cardioembolic stroke TOAST features**

| <b>High-risk sources</b>   |                                                             | <b>Data Sources</b>        |             | <b>Time window of feature (relative to stroke)</b> |
|----------------------------|-------------------------------------------------------------|----------------------------|-------------|----------------------------------------------------|
| <b>1</b>                   | Mechanical prosthetic valve and Bioprosthetic cardiac valve | ICD codes, Procedure codes |             | Before or up to 90d after stroke                   |
| <b>2</b>                   | Mitral stenosis                                             | ICD codes                  | Echo report | Before or up to 90d after stroke                   |
| <b>3</b>                   | Atrial fibrillation (including lone atrial fibrillation)    | ICD codes                  |             | Before or up to 90d after stroke                   |
| <b>4</b>                   | Left atrial/atrial appendage thrombus                       |                            | Echo report | 90d before or after stroke                         |
|                            | Intracardiac thrombus*                                      | ICD codes                  |             | 90d before or after stroke                         |
| <b>5</b>                   | Sick sinus syndrome                                         | ICD codes                  |             | Before or up to 90d after stroke                   |
| <b>6</b>                   | Recent myocardial infarction (<4 weeks)                     | ICD codes, CPT codes       |             | <=4 weeks prior by definition                      |
| <b>7</b>                   | Left ventricular thrombus                                   |                            | Echo Report | Before or up to 90d after stroke                   |
| <b>8</b>                   | Dilated cardiomyopathy                                      | ICD codes                  |             | Before or up to 90d after stroke                   |
| <b>9</b>                   | Akinetic left ventricular segment                           |                            | Echo report | Before or up to 90d after stroke                   |
| <b>10</b>                  | Atrial myxoma                                               | ICD codes                  |             | Before or up to 90d after stroke                   |
| <b>11</b>                  | Infective endocarditis                                      | ICD codes                  |             | 90d before or after stroke                         |
| <b>Medium-risk sources</b> |                                                             |                            |             |                                                    |
| <b>12</b>                  | Mitral valve prolapse                                       | ICD codes                  | Echo report | Before or up to 90d after stroke                   |
| <b>13</b>                  | Mitral annulus calcification                                | ICD codes                  | Echo report | Before or up to 90d after stroke                   |
| <b>14</b>                  | Left atrial turbulence (smoke)                              |                            | Echo report | 90d before or after stroke                         |
| <b>15</b>                  | Atrial septal aneurysm                                      | ICD codes                  | Echo report | Before or up to 90d after stroke                   |

|    |                                             |                            |             |                                              |
|----|---------------------------------------------|----------------------------|-------------|----------------------------------------------|
| 16 | Patent foramen ovale                        | ICD codes                  | Echo report | Before or up to 90d after stroke             |
| 17 | Atrial flutter                              | ICD codes                  |             | Before or up to 90d after stroke             |
| 18 | Nonbacterial thrombotic endocarditis        | ICD codes                  |             | 90d before or after stroke                   |
| 19 | Congestive heart failure                    | ICD codes                  |             | Before or up to 90d after stroke             |
| 20 | Hypokinetic left ventricular segment        |                            | Echo report | Before or up to 90d after stroke             |
| 21 | Myocardial infarction (>4 weeks, <6 months) | ICD codes, Procedure codes |             | Between 6 mos to 4 weeks after by definition |
|    | Delayed emptying velocity <sup>†</sup>      |                            | Echo report | 90d before or after stroke                   |

(1) **Mechanical prosthetic valve and Bioprosthetic cardiac valve.** Under TOAST, Mechanical prosthetic valve is a high-risk source and Bioprosthetic cardiac valve is a medium-risk source. Under this electronic phenotyping algorithm, we merge these two features into one feature since there is not enough resolution to discriminate between them. Many procedure codes could be used for either type of valve.

(2) **Mitral stenosis.** Under TOAST, Mitral stenosis with atrial fibrillation is a high-risk source and Mitral stenosis without atrial fibrillation is a medium-risk source. Under this electronic phenotyping algorithm, we treat mitral stenosis and atrial fibrillation as separate features.

(3) **Atrial fibrillation.** Under TOAST, atrial fibrillation and lone atrial fibrillation are treated as two separate features, where Atrial fibrillation (other than lone atrial fibrillation) is a high-risk source and lone atrial fibrillation is a medium-risk source. Under this electronic phenotyping algorithm, this feature has been subordinated into one “Atrial Fibrillation” feature.

(4) **Left atrial/atrial appendage thrombus.** Under this electronic phenotyping algorithm, an additional sub-feature, “Non-specific intracardiac thrombus”, was created based on ICD codes since there are no ICD codes specific for left atrial appendage thrombus.

(16) **Patent foramen ovale.** Under this electronic phenotyping algorithm, patent foramen ovale feature consists of two sub-features: patent foramen ovale and atrial septal defect since they both render similar clinical effects.

\* **Intracardiac thrombus.** An additional ICD-based feature was developed for intracardiac thrombus since ICD codes existed for intracardiac thrombus albeit not particularly for left atrial appendage thrombus.

† **Delayed emptying velocity.** An NLP feature was developed for delayed left atrial appendage emptying velocity since expert knowledge deemed it clinically relevant to cardioembolism.

**Table II. ICD codes and procedure codes for algorithm dictionary**

| <b>Code Type</b>                                         | <b>Code</b> | <b>Code Description</b>                                                                                                 |
|----------------------------------------------------------|-------------|-------------------------------------------------------------------------------------------------------------------------|
| Mitral stenosis                                          |             |                                                                                                                         |
| ICD9                                                     | 394.0       | Mitral stenosis                                                                                                         |
| ICD9                                                     | 394.2       | Mitral stenosis with insufficiency                                                                                      |
| ICD9                                                     | 396.0       | Mitral valve stenosis and aortic valve stenosis                                                                         |
| ICD9                                                     | 396.1       | Mitral valve stenosis and aortic valve insufficiency                                                                    |
| ICD9                                                     | 746.5       | Congenital mitral stenosis                                                                                              |
| ICD10                                                    | I05.0       | Rheumatic mitral stenosis                                                                                               |
| ICD10                                                    | I05.2       | Rheumatic mitral stenosis with insufficiency                                                                            |
| ICD10                                                    | I34.2       | Nonrheumatic mitral (valve) stenosis                                                                                    |
| ICD10                                                    | Q23.2       | Congenital mitral stenosis                                                                                              |
| Atrial fibrillation (including lone atrial fibrillation) |             |                                                                                                                         |
| ICD9                                                     | 427.3       | Atrial fibrillation and flutter                                                                                         |
| ICD9                                                     | 427.31      | Atrial fibrillation                                                                                                     |
| ICD10                                                    | I48         | Atrial fibrillation and flutter                                                                                         |
| ICD10                                                    | I48.0       | Paroxysmal atrial fibrillation                                                                                          |
| ICD10                                                    | I48.1       | Persistent atrial fibrillation                                                                                          |
| ICD10                                                    | I48.2       | Chronic atrial fibrillation                                                                                             |
| ICD10                                                    | I48.9       | Unspecified atrial fibrillation and atrial flutter                                                                      |
| ICD10                                                    | I48.91      | Unspecified atrial fibrillation                                                                                         |
| Intracardiac thrombus                                    |             |                                                                                                                         |
| ICD10                                                    | I23.6       | Thrombosis of atrium, auricular appendage, and ventricle as current complications following acute myocardial infarction |
| ICD10                                                    | I51.3       | Intracardiac thrombosis, not elsewhere classified                                                                       |
| Sick sinus syndrome                                      |             |                                                                                                                         |
| ICD9                                                     | 427.81      | Sinoatrial dysfunction                                                                                                  |
| ICD10                                                    | I49.5       | Sick sinus syndrome                                                                                                     |
| Atrial myxoma                                            |             |                                                                                                                         |
| ICD9                                                     | 212.7       | Benign neoplasm of heart                                                                                                |
| ICD10                                                    | D15.1       | Benign neoplasm of heart                                                                                                |
| Recent myocardial infarction (<4weeks)                   |             |                                                                                                                         |
| ICD9                                                     | 410         | Acute myocardial infarction                                                                                             |
| ICD9                                                     | 410.0       | Acute myocardial infarction, of anterolateral wall                                                                      |
| ICD9                                                     | 410.01      | Acute myocardial infarction, of anterolateral wall, initial episode of care                                             |
| ICD9                                                     | 410.1       | Acute myocardial infarction, of other anterior wall                                                                     |
| ICD9                                                     | 410.11      | Acute myocardial infarction, of other anterior wall, initial episode of care                                            |
| ICD9                                                     | 410.21      | Acute myocardial infarction, of inferolateral wall, initial episode of care                                             |
| ICD9                                                     | 410.3       | Acute myocardial infarction, of inferoposterior wall                                                                    |
| ICD9                                                     | 410.31      | Acute myocardial infarction, of inferoposterior wall, initial episode of care                                           |



|                        |        |                                                                                               |
|------------------------|--------|-----------------------------------------------------------------------------------------------|
| ICD9                   | 410.4  | Acute myocardial infarction, of other inferior wall                                           |
| ICD9                   | 410.41 | Acute myocardial infarction, of other inferior wall, initial episode of care                  |
| ICD9                   | 410.51 | Acute myocardial infarction, of other lateral wall, initial episode of care                   |
| ICD9                   | 410.6  | Acute myocardial infarction, true posterior wall infarction                                   |
| ICD9                   | 410.61 | Acute myocardial infarction, true posterior wall infarction, initial episode of care          |
| ICD9                   | 410.7  | Acute myocardial infarction, subendocardial infarction                                        |
| ICD9                   | 410.71 | Acute myocardial infarction, subendocardial infarction, initial episode of care               |
| ICD9                   | 410.8  | Acute myocardial infarction, of other specified sites                                         |
| ICD9                   | 410.81 | Acute myocardial infarction, of other specified sites, initial episode of care                |
| ICD9                   | 410.9  | Acute myocardial infarction, unspecified site                                                 |
| ICD9                   | 410.91 | Acute myocardial infarction, unspecified site, initial episode of care                        |
| ICD10                  | I21    | St elevation (STEMI) and non-ST elevation (NSTEMI) myocardial infarction                      |
| ICD10                  | I21.0  | St elevation (STEMI) myocardial infarction of anterior wall                                   |
| ICD10                  | I21.01 | St elevation (STEMI) myocardial infarction involving left main coronary artery                |
| ICD10                  | I21.02 | St elevation (STEMI) myocardial infarction involving left anterior descending coronary artery |
| ICD10                  | I21.09 | St elevation (STEMI) myocardial infarction involving other coronary artery of anterior wall   |
| ICD10                  | I21.1  | St elevation (STEMI) myocardial infarction of inferior wall                                   |
| ICD10                  | I21.11 | St elevation (STEMI) myocardial infarction involving right coronary artery                    |
| ICD10                  | I21.19 | St elevation (STEMI) myocardial infarction involving other coronary artery of inferior wall   |
| ICD10                  | I21.2  | St elevation (STEMI) myocardial infarction of other sites                                     |
| ICD10                  | I21.21 | St elevation (STEMI) myocardial infarction involving left circumflex coronary artery          |
| ICD10                  | I21.29 | St elevation (STEMI) myocardial infarction involving other sites                              |
| ICD10                  | I21.3  | St elevation (STEMI) myocardial infarction of unspecified site                                |
| ICD10                  | I21.4  | Non-ST elevation (NSTEMI) myocardial infarction                                               |
| Dilated cardiomyopathy |        |                                                                                               |
| ICD9                   | 425.4  | Other primary cardiomyopathies                                                                |
| ICD10                  | I42.0  | Dilated cardiomyopathy                                                                        |
| Infective Endocarditis |        |                                                                                               |
| ICD9                   | 421    | Acute and subacute endocarditis                                                               |
| ICD9                   | 421.9  | Acute endocarditis, unspecified                                                               |
| ICD9                   | 424.9  | Endocarditis, valve unspecified                                                               |
| ICD9                   | 424.90 | Endocarditis, valve unspecified, unspecified cause                                            |
| ICD9                   | 424.91 | Endocarditis in diseases classified elsewhere                                                 |
| ICD9                   | 424.99 | Other endocarditis, valve unspecified                                                         |
| ICD10                  | I33    | Acute and subacute endocarditis                                                               |
| ICD10                  | I33.0  | Acute and subacute infective endocarditis                                                     |
| ICD10                  | I33.9  | Acute and subacute endocarditis, unspecified                                                  |

|                                                       |        |                                                                                                                                                            |
|-------------------------------------------------------|--------|------------------------------------------------------------------------------------------------------------------------------------------------------------|
| ICD10                                                 | I38    | Endocarditis, valve unspecified                                                                                                                            |
| ICD10                                                 | I39    | Endocarditis and heart valve disorders in diseases classified elsewhere                                                                                    |
| Mitral valve prolapse                                 |        |                                                                                                                                                            |
| ICD10                                                 | I34.1  | Nonrheumatic mitral (valve) prolapse                                                                                                                       |
| Mitral annulus calcification                          |        |                                                                                                                                                            |
| ICD10                                                 | I34.8  | Other nonrheumatic mitral valve disorders                                                                                                                  |
| Patent foramen ovale (including atrial septal defect) |        |                                                                                                                                                            |
| ICD10                                                 | I23.1  | Atrial septal defect as current complication following acute myocardial infarction                                                                         |
| ICD10                                                 | Q21.1  | Atrial septal defect                                                                                                                                       |
| ICD9<br>Procedure<br>Code                             | 35.41  | Enlargement Of Existing Atrial Septal Defect                                                                                                               |
| Atrial flutter                                        |        |                                                                                                                                                            |
| ICD9                                                  | 427.32 | Atrial flutter                                                                                                                                             |
| ICD10                                                 | I48.3  | Typical atrial flutter                                                                                                                                     |
| ICD10                                                 | I48.4  | Atypical atrial flutter                                                                                                                                    |
| ICD10                                                 | I48.92 | Unspecified atrial flutter                                                                                                                                 |
| Nonbacterial thrombotic endocarditis                  |        |                                                                                                                                                            |
| ICD9                                                  | 391.1  | Acute rheumatic endocarditis                                                                                                                               |
| ICD10                                                 | I01.1  | Acute rheumatic endocarditis                                                                                                                               |
| ICD10                                                 | M32.11 | Endocarditis in systemic lupus erythematosus                                                                                                               |
| Congestive heart failure                              |        |                                                                                                                                                            |
| ICD9                                                  | 402.01 | Malignant hypertensive heart disease with congestive heart failure                                                                                         |
| ICD9                                                  | 402.11 | Benign hypertensive heart disease with congestive heart failure                                                                                            |
| ICD9                                                  | 402.91 | Unspecified hypertensive heart disease with congestive heart failure                                                                                       |
| ICD9                                                  | 404.01 | Hypertensive heart and renal disease, malignant, with congestive heart failure                                                                             |
| ICD9                                                  | 404.03 | Hypertensive heart and renal disease, malignant, with congestive heart failure and renal failure                                                           |
| ICD9                                                  | 404.11 | Hypertensive heart and renal disease, benign, with congestive heart failure                                                                                |
| ICD9                                                  | 404.13 | Hypertensive heart and renal disease, benign, with congestive heart failure and renal failure                                                              |
| ICD9                                                  | 404.91 | Hypertensive heart and renal disease, unspecified, with congestive heart failure                                                                           |
| ICD9                                                  | 404.93 | Hypertensive heart and renal disease, unspecified, with congestive heart failure and renal failure                                                         |
| ICD9                                                  | 428.0  | Congestive heart failure                                                                                                                                   |
| ICD10                                                 | I11.0  | Hypertensive Heart Disease With Heart Failure                                                                                                              |
| ICD10                                                 | I13.0  | Hypertensive Heart And Chronic Kidney Disease With Heart Failure And Stage 1 Through Stage 4 Chronic Kidney Disease, Or Unspecified Chronic Kidney Disease |
| ICD10                                                 | I13.2  | Hypertensive Heart And Chronic Kidney Disease With Heart Failure And With Stage 5 Chronic Kidney Disease, Or End Stage Renal Disease                       |
| ICD10                                                 | I50.20 | Unspecified Systolic (Congestive) Heart Failure                                                                                                            |

|                                             |         |                                                                                          |
|---------------------------------------------|---------|------------------------------------------------------------------------------------------|
| ICD10                                       | I50.21  | Acute Systolic (Congestive) Heart Failure                                                |
| ICD10                                       | I50.22  | Chronic Systolic (Congestive) Heart Failure                                              |
| ICD10                                       | I50.23  | Acute On Chronic Systolic (Congestive) Heart Failure                                     |
| ICD10                                       | I50.30  | Unspecified Diastolic (Congestive) Heart Failure                                         |
| ICD10                                       | I50.31  | Acute Diastolic (Congestive) Heart Failure                                               |
| ICD10                                       | I50.32  | Chronic Diastolic (Congestive) Heart Failure                                             |
| ICD10                                       | I50.33  | Acute On Chronic Diastolic (Congestive) Heart Failure                                    |
| ICD10                                       | I50.40  | Unspecified Combined Systolic (Congestive) And Diastolic (Congestive) Heart Failure      |
| ICD10                                       | I50.41  | Acute Combined Systolic (Congestive) And Diastolic (Congestive) Heart Failure            |
| ICD10                                       | I50.42  | Chronic Combined Systolic (Congestive) And Diastolic (Congestive) Heart Failure          |
| ICD10                                       | I50.43  | Acute On Chronic Combined Systolic (Congestive) And Diastolic (Congestive) Heart Failure |
| ICD10                                       | I50.814 | Right heart failure due to left heart failure                                            |
| ICD10                                       | I50.9   | Heart failure, unspecified                                                               |
| Myocardial infarction (>4 weeks, <6 months) |         |                                                                                          |
| ICD9                                        | 410     | Acute myocardial infarction                                                              |
| ICD9                                        | 410.0   | Acute myocardial infarction, of anterolateral wall                                       |
| ICD9                                        | 410.00  | Acute myocardial infarction, of anterolateral wall, episode of care unspecified          |
| ICD9                                        | 410.01  | Acute myocardial infarction, of anterolateral wall, initial episode of care              |
| ICD9                                        | 410.02  | Acute myocardial infarction, of anterolateral wall, subsequent episode of care           |
| ICD9                                        | 410.1   | Acute myocardial infarction, of other anterior wall                                      |
| ICD9                                        | 410.10  | Acute myocardial infarction, of other anterior wall, episode of care unspecified         |
| ICD9                                        | 410.11  | Acute myocardial infarction, of other anterior wall, initial episode of care             |
| ICD9                                        | 410.12  | Acute myocardial infarction, of other anterior wall, subsequent episode of care          |
| ICD9                                        | 410.2   | Acute myocardial infarction, of inferolateral wall                                       |
| ICD9                                        | 410.20  | Acute myocardial infarction, of inferolateral wall, episode of care unspecified          |
| ICD9                                        | 410.21  | Acute myocardial infarction, of inferolateral wall, initial episode of care              |
| ICD9                                        | 410.22  | Acute myocardial infarction, of inferolateral wall, subsequent episode of care           |
| ICD9                                        | 410.3   | Acute myocardial infarction, of inferoposterior wall                                     |
| ICD9                                        | 410.30  | Acute myocardial infarction, of inferoposterior wall, episode of care unspecified        |
| ICD9                                        | 410.31  | Acute myocardial infarction, of inferoposterior wall, initial episode of care            |
| ICD9                                        | 410.32  | Acute myocardial infarction, of inferoposterior wall, subsequent episode of care         |
| ICD9                                        | 410.4   | Acute myocardial infarction, of other inferior wall                                      |
| ICD9                                        | 410.40  | Acute myocardial infarction, of other inferior wall, episode of care unspecified         |

|       |        |                                                                                               |
|-------|--------|-----------------------------------------------------------------------------------------------|
| ICD9  | 410.41 | Acute myocardial infarction, of other inferior wall, initial episode of care                  |
| ICD9  | 410.42 | Acute myocardial infarction, of other inferior wall, subsequent episode of care               |
| ICD9  | 410.50 | Acute myocardial infarction, of other lateral wall, episode of care unspecified               |
| ICD9  | 410.51 | Acute myocardial infarction, of other lateral wall, initial episode of care                   |
| ICD9  | 410.52 | Acute myocardial infarction, of other lateral wall, subsequent episode of care                |
| ICD9  | 410.6  | Acute myocardial infarction, true posterior wall infarction                                   |
| ICD9  | 410.60 | Acute myocardial infarction, true posterior wall infarction, episode of care unspecified      |
| ICD9  | 410.61 | Acute myocardial infarction, true posterior wall infarction, initial episode of care          |
| ICD9  | 410.62 | Acute myocardial infarction, true posterior wall infarction, subsequent episode of care       |
| ICD9  | 410.7  | Acute myocardial infarction, subendocardial infarction                                        |
| ICD9  | 410.70 | Acute myocardial infarction, subendocardial infarction, episode of care unspecified           |
| ICD9  | 410.71 | Acute myocardial infarction, subendocardial infarction, initial episode of care               |
| ICD9  | 410.72 | Acute myocardial infarction, subendocardial infarction, subsequent episode of care            |
| ICD9  | 410.8  | Acute myocardial infarction, of other specified sites                                         |
| ICD9  | 410.80 | Acute myocardial infarction, of other specified sites, episode of care unspecified            |
| ICD9  | 410.81 | Acute myocardial infarction, of other specified sites, initial episode of care                |
| ICD9  | 410.82 | Acute myocardial infarction, of other specified sites, subsequent episode of care             |
| ICD9  | 410.9  | Acute myocardial infarction, unspecified site                                                 |
| ICD9  | 410.90 | Acute myocardial infarction, unspecified site, episode of care unspecified                    |
| ICD9  | 410.91 | Acute myocardial infarction, unspecified site, initial episode of care                        |
| ICD9  | 410.92 | Acute myocardial infarction, unspecified site, subsequent episode of care                     |
| ICD9  | 412    | Old myocardial infarction                                                                     |
| ICD10 | I21    | St elevation (STEMI) and non-ST elevation (NSTEMI) myocardial infarction                      |
| ICD10 | I21.0  | ST elevation (STEMI) myocardial infarction of anterior wall                                   |
| ICD10 | I21.01 | ST elevation (STEMI) myocardial infarction involving left main coronary artery                |
| ICD10 | I21.02 | ST elevation (STEMI) myocardial infarction involving left anterior descending coronary artery |
| ICD10 | I21.09 | ST elevation (STEMI) myocardial infarction involving other coronary artery of anterior wall   |
| ICD10 | I21.1  | ST elevation (STEMI) myocardial infarction of inferior wall                                   |
| ICD10 | I21.11 | ST elevation (STEMI) myocardial infarction involving right coronary artery                    |
| ICD10 | I21.19 | ST elevation (STEMI) myocardial infarction involving other coronary artery of inferior wall   |
| ICD10 | I21.2  | ST elevation (STEMI) myocardial infarction of other sites                                     |

|                                                               |        |                                                                                                                                                                                                                                                                  |
|---------------------------------------------------------------|--------|------------------------------------------------------------------------------------------------------------------------------------------------------------------------------------------------------------------------------------------------------------------|
| ICD10                                                         | I21.21 | St elevation (STEMI) myocardial infarction involving left circumflex coronary artery                                                                                                                                                                             |
| ICD10                                                         | I21.29 | St elevation (STEMI) myocardial infarction involving other sites                                                                                                                                                                                                 |
| ICD10                                                         | I21.3  | St elevation (STEMI) myocardial infarction of unspecified site                                                                                                                                                                                                   |
| ICD10                                                         | I21.4  | Non-ST elevation (NSTEMI) myocardial infarction                                                                                                                                                                                                                  |
| ICD10                                                         | I22    | Subsequent ST elevation (STEMI) and non-ST elevation (NSTEMI) myocardial infarction                                                                                                                                                                              |
| ICD10                                                         | I22.0  | Subsequent ST elevation (STEMI) myocardial infarction of anterior wall                                                                                                                                                                                           |
| ICD10                                                         | I22.1  | Subsequent ST elevation (STEMI) myocardial infarction of inferior wall                                                                                                                                                                                           |
| ICD10                                                         | I22.2  | Subsequent non-ST elevation (NSTEMI) myocardial infarction                                                                                                                                                                                                       |
| ICD10                                                         | I22.8  | Subsequent ST elevation (STEMI) myocardial infarction of other sites                                                                                                                                                                                             |
| ICD10                                                         | I22.9  | Subsequent ST elevation (STEMI) myocardial infarction of unspecified site                                                                                                                                                                                        |
| ICD10                                                         | I25.2  | Old myocardial infarction                                                                                                                                                                                                                                        |
| Mechanical prosthetic valve or bioprosthetic mechanical valve |        |                                                                                                                                                                                                                                                                  |
| CPT                                                           | 33361  | Transcatheter aortic valve replacement (TAVR/TAVI) with prosthetic valve; percutaneous femoral artery approach                                                                                                                                                   |
| CPT                                                           | 33362  | Transcatheter aortic valve replacement (TAVR/TAVI) with prosthetic valve; open femoral artery approach                                                                                                                                                           |
| CPT                                                           | 33363  | Transcatheter aortic valve replacement (TAVR/TAVI) with prosthetic valve; open axillary artery approach                                                                                                                                                          |
| CPT                                                           | 33364  | Transcatheter aortic valve replacement (TAVR/TAVI) with prosthetic valve; open iliac artery approach                                                                                                                                                             |
| CPT                                                           | 33365  | Transcatheter aortic valve replacement (TAVR/TAVI) with prosthetic valve; transaortic approach (eg, median sternotomy, mediastinotomy)                                                                                                                           |
| CPT                                                           | 33366  | Transcatheter aortic valve replacement (TAVR/TAVI) with prosthetic valve; transapical exposure (eg, left thoracotomy)                                                                                                                                            |
| CPT                                                           | 33367  | Transcatheter aortic valve replacement (TAVR/TAVI) with prosthetic valve; cardiopulmonary bypass support with percutaneous peripheral arterial and venous cannulation (eg, femoral vessels) (List separately in addition to code for primary procedure)          |
| CPT                                                           | 33368  | Transcatheter aortic valve replacement (TAVR/TAVI) with prosthetic valve; cardiopulmonary bypass support with open peripheral arterial and venous cannulation (eg, femoral, iliac, axillary vessels) (List separately in addition to code for primary procedure) |
| CPT                                                           | 33369  | Transcatheter aortic valve replacement (TAVR/TAVI) with prosthetic valve; cardiopulmonary bypass support with central arterial and venous cannulation (eg, aorta, right atrium, pulmonary artery) (List separately in addition to code for primary procedure)    |
| CPT                                                           | 33405  | Replacement, aortic valve, with cardiopulmonary bypass; with prosthetic valve other than homograft or stentless valve                                                                                                                                            |
| CPT                                                           | 33406  | Replacement, aortic valve, open, with cardiopulmonary bypass; with allograft valve (freehand)                                                                                                                                                                    |
| CPT                                                           | 33410  | Replacement, aortic valve, open, with cardiopulmonary bypass; with stentless tissue valve                                                                                                                                                                        |
| CPT                                                           | 33411  | Replacement, aortic valve; with aortic annulus enlargement, noncoronary cusp                                                                                                                                                                                     |
| CPT                                                           | 33412  | Replacement, aortic valve; with transventricular aortic annulus enlargement (Konno procedure)                                                                                                                                                                    |

|                     |       |                                                                                                                                                                                                                    |
|---------------------|-------|--------------------------------------------------------------------------------------------------------------------------------------------------------------------------------------------------------------------|
| CPT                 | 33418 | Transcatheter mitral valve repair, percutaneous approach, including transseptal puncture when performed; initial prosthesis                                                                                        |
| CPT                 | 33419 | Transcatheter mitral valve repair, percutaneous approach, including transseptal puncture when performed; additional prosthesis(es) during same session (List separately in addition to code for primary procedure) |
| CPT                 | 33430 | Replacement, mitral valve, with cardiopulmonary bypass                                                                                                                                                             |
| ICD9 Procedure Code | 35.05 | Endovascular replacement of aortic valve                                                                                                                                                                           |
| ICD9 Procedure Code | 35.06 | Transapical replacement of aortic valve                                                                                                                                                                            |
| ICD9 Procedure Code | 35.07 | Endovascular Replacement Of Pulmonary Valve                                                                                                                                                                        |
| ICD9 Procedure Code | 35.08 | Transapical Replacement Of Pulmonary Valve                                                                                                                                                                         |
| ICD9 Procedure Code | 35.09 | Endovascular Replacement Of Unspecified Heart Valve                                                                                                                                                                |
| ICD9 Procedure Code | 35.20 | Open and other replacement of unspecified heart valve                                                                                                                                                              |
| ICD9 Procedure Code | 35.21 | Open and other replacement of aortic valve with tissue graft                                                                                                                                                       |
| ICD9 Procedure Code | 35.22 | Other replacement of aortic valve                                                                                                                                                                                  |
| ICD9 Procedure Code | 35.23 | Replacement of mitral valve with tissue graft                                                                                                                                                                      |
| ICD9 Procedure Code | 35.24 | Other replacement of mitral valve                                                                                                                                                                                  |
| ICD9 Procedure Code | 35.25 | Open And Other Replacement Of Pulmonary Valve With Tissue Graft                                                                                                                                                    |
| ICD9 Procedure Code | 35.26 | Open And Other Replacement Of Pulmonary Valve                                                                                                                                                                      |
| ICD9 Procedure Code | 35.27 | Open And Other Replacement Of Tricuspid Valve With Tissue Graft                                                                                                                                                    |
| ICD9 Procedure Code | 35.28 | Open And Other Replacement Of Tricuspid Valve                                                                                                                                                                      |

|                                      |        |                                                                                    |
|--------------------------------------|--------|------------------------------------------------------------------------------------|
| ICD9<br>Procedure<br>Code            | 35.97  | Percutaneous mitral valve repair with implant                                      |
| Hypokinetic left ventricular segment |        |                                                                                    |
| ICD9                                 | 414.1  | Aneurysm of heart                                                                  |
| ICD9                                 | 414.10 | Aneurysm of heart (wall)                                                           |
| ICD9                                 | 414.19 | Other aneurysm of heart                                                            |
| ICD10                                | I23.1  | Atrial septal defect as current complication following acute myocardial infarction |
| ICD10                                | I25.3  | Aneurysm of heart                                                                  |

**Table III. Initial and final search criteria for each echo report feature.**

| <i>Feature</i>                                                                 | <i>Cardiology Report Type</i>                                | <i>Search Location</i>                  | <i>Initial Search Terms for Search Criteria</i> | <i>Final Search Terms for Search Criteria</i>                                                                                                                                                        |
|--------------------------------------------------------------------------------|--------------------------------------------------------------|-----------------------------------------|-------------------------------------------------|------------------------------------------------------------------------------------------------------------------------------------------------------------------------------------------------------|
| <i>Mitral stenosis (with atrial fibrillation, without atrial fibrillation)</i> |                                                              |                                         | mitral stenosis                                 | mitral stenosis                                                                                                                                                                                      |
| <i>Left atrial/atrial appendage thrombus</i>                                   | Transesophageal echo report (not transthoracic echo report), | Under [left atrium field]               | thrombus, clot                                  | left atrial appendage < thrombus<br>thrombus < left atrial appendage<br>left atrial appendage < clot<br>clot < left atrial appendage                                                                 |
| <i>Left ventricular thrombus</i>                                               |                                                              |                                         | left ventricular thrombus                       | lv thrombus<br>lv clot<br>left ventr (thromb   clot)<br>(thromb   clot) left ventr<br>thromb   clot lv<br><br>left ventr (apex apical) (thromb   clot)                                               |
| <i>Akinetic left ventricular segment</i>                                       |                                                              | Under [left ventricular function field] | akinesis, dyskinesis                            | “akine” under [Left Ventricle] field<br>“dyskine” under [Left Ventricle] field<br><br>[See Example: NLP Algorithm for Search Terms in Specified Report Location (Akinetic Left Ventricular Segment)] |
| <i>Mitral valve prolapse</i>                                                   |                                                              | Under [mitral valve field]              | prolapse, flail leaflet                         | mitral prolapse                                                                                                                                                                                      |
| <i>Mitral annulus calcification</i>                                            |                                                              | Under [mitral valve field]              | calcification                                   | mitral annul* calcif*                                                                                                                                                                                |
| <i>Left atrial turbulence (smoke)</i>                                          | Transesophageal echo report (not transthoracic echo report)  |                                         | smoke                                           | smoke,<br>then in sentences with smoke, find<br>“left atr”, “laa”, “la appendage”,<br>“left atrial appendage”,<br>“appendage”<br><br>left atrium < spontaneous echo contrast                         |



|                                             |  |                                                        |                                                      |                                                                                                                                          |
|---------------------------------------------|--|--------------------------------------------------------|------------------------------------------------------|------------------------------------------------------------------------------------------------------------------------------------------|
|                                             |  |                                                        |                                                      | spontaneous echo contrast < (laa   la appendage   left atr   left atrial appendage   appendage)                                          |
| <i>Delayed emptying velocity</i>            |  |                                                        |                                                      | [See Example: NLP Algorithm for Features Reported in Different Formats (Delayed Emptying Velocity)]                                      |
| <i>Atrial septal aneurysm</i>               |  |                                                        | atrial septal aneurysm, interatrial septal aneurysm  | atrial sept < aneurysm<br>aneurysm < atrial sept<br><br>interatrial sept < aneurysm<br>aneurysm < interatrial sept                       |
| <i>Patent foramen ovale</i>                 |  |                                                        | patent foramen ovale, shunting, atrial septal defect | patent foramen ovale<br>pfo<br><br>atrial septal defect<br><br>interatrial (shunt   communication)<br>intracards shunt<br>residual shunt |
| <i>Hypokinetic left ventricular segment</i> |  | [See derived left ventricular ejection fraction field] | Use LVEF ≤ 40%                                       | LV EF<br>ejection fraction<br>left ventricular function                                                                                  |

Note that “Akinetic left ventricular segment” feature includes “akinesis” and “dyskinesis” of the left ventricle and is considered separate from “Hypokinetic left ventricular segment”. In addition, “<” denotes “before”; for example, the final search term “left atrial appendage < thrombus” denotes that phrases wherein “left atrial appendage” appears before “thrombus” were identified for extraction.

**Table IV. Descriptive summary of algorithms of NLP-based TOAST-based features**

| <b>Cardioembolic Feature based on NLP</b>             | <b>PPV</b> | <b>Number of Charts Reviewed</b> | <b>Number of Cases Detected</b> | <b>Number of Cases Without Feature (Total = 440985)</b> |
|-------------------------------------------------------|------------|----------------------------------|---------------------------------|---------------------------------------------------------|
| Mitral Stenosis                                       | 94%        | 100                              | 919                             | 440066                                                  |
| Left atrial appendage thrombus                        | 90%        | 100                              | 142                             | 440843                                                  |
| Left ventricular thrombus                             | 94%        | 50                               | 104                             | 440881                                                  |
| Akinetic left ventricular segment                     | 92%        | 100                              | 2411                            | 438574                                                  |
| Mitral valve prolapse                                 | 88%        | 100                              | 1248                            | 439737                                                  |
| Mitral annulus calcification                          | 100%       | 50                               | 10021                           | 430964                                                  |
| Left atrial turbulence                                | 100%       | 100                              | 360                             | 440625                                                  |
| Delayed emptying velocity                             | 96%        | 50                               | 330                             | 440655                                                  |
| Atrial septal aneurysm                                | 98%        | 100                              | 277                             | 440708                                                  |
| Patent foramen ovale (including atrial septal defect) | 98%        | 100                              | 2070                            | 438915                                                  |
| Hypokinetic left ventricular segment                  | 94%        | 50                               | 8703                            | 54257 (378025 NA's)                                     |

The Mass General Brigham Biobank was used to test and develop the algorithms for NLP-based features. The algorithms were applied to the entire dataset to detect the prevalence of the TOAST-based features and adjudication was performed to assess their PPVs.

**Table V. Summary of echocardiograms among patients in MGH Stroke Registry**

|                                                                            |                                                                                                        |                     |
|----------------------------------------------------------------------------|--------------------------------------------------------------------------------------------------------|---------------------|
|                                                                            |                                                                                                        | MGH Stroke Registry |
| Total number of patients                                                   |                                                                                                        | 1598                |
| Stroke patients                                                            |                                                                                                        | 1598 (100%)         |
| Stroke patients without either TEE/TTE/echo not clearly labeled as TEE/TTE |                                                                                                        | 107 (6.7%)          |
| Stroke patients with either TEE/TTE/echo not clearly labeled as TEE/TTE    |                                                                                                        | 1491 (93.3%)        |
|                                                                            |                                                                                                        |                     |
| Stroke patients with TEE                                                   |                                                                                                        | 218 (13.6%)         |
|                                                                            | Stroke patients with TEE within 4 weeks before or after stroke event                                   | 85 (5.3%)           |
|                                                                            | Stroke patients with TEE within 90 weeks before or after stroke event                                  | 113 (7.1%)          |
|                                                                            | Stroke patients with TEE within 4 weeks to 6 months stroke after event                                 | 49 (3.1%)           |
| Stroke patients with TTE                                                   |                                                                                                        | 792 (49.6%)         |
|                                                                            | Stroke patients with TTE within 4 weeks before or after stroke event                                   | 585 (36.6%)         |
|                                                                            | Stroke patients with TTE within 90 weeks before or after stroke event                                  | 629 (39.4%)         |
|                                                                            | Stroke patients with TTE within 4 weeks to 6 months stroke after event                                 | 79 (4.9%)           |
| Stroke patients with echocardiogram (not clearly labeled as TEE/TTE)       |                                                                                                        | 1044 (65.3%)        |
|                                                                            | Stroke patients with echoes not clearly labeled as TEE/TTE within 4 weeks before or after stroke event | 888 (55.6%)         |
|                                                                            | Stroke patients with echoes not clearly labeled as TEE/TTE within 90 days before or after stroke event | 959 (60.0%)         |

|                                                                      |                                                                                                          |           |
|----------------------------------------------------------------------|----------------------------------------------------------------------------------------------------------|-----------|
|                                                                      | Stroke patients with echoes not clearly labeled as TEE/TTE within 4 weeks to 6 months stroke after event | 95 (5.9%) |
| TEE=transesophageal echocardiogram; TTE=Transthoracic echocardiogram |                                                                                                          |           |

**Table VI. Different formats for reporting positive cases of delayed emptying velocity**

| Secondary Keywords                                                                     | Positive Keywords                                        | Sentence Structure                                                                                                                                                                                               | Modifier                        | Number                                                                                      | Unit                              |
|----------------------------------------------------------------------------------------|----------------------------------------------------------|------------------------------------------------------------------------------------------------------------------------------------------------------------------------------------------------------------------|---------------------------------|---------------------------------------------------------------------------------------------|-----------------------------------|
| “emptying”                                                                             | “left atrial appendage”<br>or “la appendage”<br>or “laa” | In same sentence                                                                                                                                                                                                 | Check if<br>”less 0.40<br>m/s”  | Check if<br>less than<br>0.40 m/s                                                           | Check if<br>m/s (change<br>units) |
| “diastolic”                                                                            | “velocit.*”                                              |                                                                                                                                                                                                                  | Check if<br>“low”,<br>“reduced” | Check if<br><1 →<br>correct<br>scale                                                        |                                   |
| “ejection”                                                                             |                                                          |                                                                                                                                                                                                                  | Check if<br>“<0.40”<br>m/s      | Range:<br>Get first<br>number in<br>range                                                   |                                   |
|                                                                                        |                                                          | “Filling and emptying<br>velocit*”<br>OR<br>“Inflow and outflow<br>velocit*”<br>OR<br>“left atrial appendage<br>velocity systolic<br>filling velocity 0.5<br>m/s and diastolic<br>emptying velocity 0.6<br>m/s.” |                                 | 1 number<br>→ Get 1 <sup>st</sup><br>number<br>2 numbers<br>→ Get 1 <sup>st</sup><br>number |                                   |
| “left atrial<br>appendage”<br>or “la<br>appendage”<br>or “laa”<br>In prior<br>sentence | “velocit”<br>In target<br>sentence                       | Difference sentences                                                                                                                                                                                             | Check if<br>”less 0.40<br>m/s”  | Check if<br><0.40 m/s                                                                       | Check if<br>m/s (change<br>units) |
|                                                                                        | “emptying”                                               |                                                                                                                                                                                                                  | Check if<br>“low”,<br>“reduced” | Check if<br><1 →<br>correct<br>scale                                                        |                                   |
|                                                                                        | “diastolic”                                              |                                                                                                                                                                                                                  |                                 | Range:<br>Get first<br>number in<br>range                                                   |                                   |
|                                                                                        | “ejection”                                               |                                                                                                                                                                                                                  |                                 |                                                                                             |                                   |

**Table VII. Different formats for reporting negative cases of delayed emptying velocity**

| <b>Secondary Keywords</b>                    | <b>Negative Keywords</b> | <b>Sentence Structure</b> | <b>Modifier</b> | <b>Number</b>        | <b>Unit</b>                          |
|----------------------------------------------|--------------------------|---------------------------|-----------------|----------------------|--------------------------------------|
| “aortic valve”,<br>“aorta”,<br>“transaortic” | “velocit.*”              | Same sentence             | >0.4 m/s        | Check if<br>>0.4 m/s | Check if<br>m/s<br>(change<br>units) |
| “mitral valve”                               |                          |                           | Greater         |                      |                                      |
| “regurgitant”                                |                          |                           | ”normal”        |                      |                                      |
| “tricuspid”                                  |                          |                           |                 |                      |                                      |
| ”pulmonary”,<br>“pv”                         |                          |                           |                 |                      |                                      |
| “vein”,<br>“veins”,<br>“venous”              |                          |                           |                 |                      |                                      |
| “lvad”                                       |                          |                           |                 |                      |                                      |
| “Systolic<br>emptying<br>velocity”           |                          |                           |                 |                      |                                      |
| “lvot”                                       |                          |                           |                 |                      |                                      |
| “transgastric”                               |                          |                           |                 |                      |                                      |
| “transvalvular”                              |                          |                           |                 |                      |                                      |

**Table VIII. Multivariable logistic regression model applied to MGH Stroke Registry**

| <b>Variables</b>                            | <b>Multivariable-adjusted OR (95% CI)</b> | <b>P-value</b>       |
|---------------------------------------------|-------------------------------------------|----------------------|
| Age                                         | 0.0301 (0.00699 - 0.119)                  | 0.11                 |
| Gender (Male)                               | 1.0164 (0.997 - 1.037)                    | 0.02                 |
| Atrial fibrillation                         | 0.5417 (0.322 - 0.909)                    | 2 x10 <sup>-16</sup> |
| Atrial flutter                              | 20.1595 (12 - 34.891)                     | 0.98                 |
| Akinetic left ventricular segment           | 0.9851 (0.363 - 2.768)                    | 0.79                 |
| Atrial myxoma                               | 1.1381 (0.432 - 2.827)                    | 0.99                 |
| Atrial septal aneurysm                      | NA                                        | 0.02                 |
| Congestive heart failure                    | 0.033 (0.001 - 0.449)                     | 0.42                 |
| Dilated cardiomyopathy                      | 0.7716 (0.406 - 1.443)                    | 0.59                 |
| Delayed Emptying Velocity                   | 1.2045 (0.606 - 2.375)                    | 0.99                 |
| Hypokinetic left ventricular segment        | 2321740.4733 (1.06E-55 - NA)              | 0.0000331            |
| Infective endocarditis                      | 5.1265 (2.38 - 11.189)                    | 0.01                 |
| Intracardiac Thrombus                       | 9.9354 (1.68 - 56.921)                    | NA                   |
| Left atrial appendage thrombus              | NA                                        | 0.63                 |
| Left atrial turbulence                      | 3.1467 (0.0549 - 221.118)                 | 0.78                 |
| Left ventricular thrombus                   | 1.7904 (0.0355 - 71.746)                  | 0.94                 |
| Mitral annulus calcification                | 1.1277 (0.0546 - 40.397)                  | 0.19                 |
| Mechanical and bioprosthetic cardiac valve  | 0.6686 (0.364 - 1.205)                    | 0.12                 |
| Myocardial infarction (>4 weeks, <6 months) | 6.7377 (0.682 - 83.105)                   | 0.11                 |
| Recent myocardial infarction (<4 weeks)     | 0.2688 (0.0474 - 1.252)                   | 0.15                 |
| Mitral stenosis                             | 1.6784 (0.823 - 3.415)                    | 0.64                 |
| Mitral valve prolapse                       | 1.3786 (0.365 - 5.4)                      | 0.76                 |
| Nonbacterial thrombotic endocarditis        | 1.4969 (0.107 - 20.61)                    | NA                   |
| Patent foramen ovale                        | NA                                        | 0.5                  |
| Sick sinus syndrome                         | 0.7891 (0.389 - 1.551)                    | 0.0021               |

**Some cardioembolic features are similar to one another, such as Atrial fibrillation and Atrial flutter; Akinetic left ventricular segment and Hypokinetic left ventricular segment; Delayed emptying velocity and Left atrial turbulence; and Congestive heart failure and Dilated Cardiomyopathy. These similarities are confirmed by moderate levels of positive correlation in Figure V as well as by similarly signed coefficients in Table VIII. Multivariable logistic regression model applied to MGH Stroke Registry**

**Table IX. Random forest model performance under inclusion of PFO compared to exclusion of PFO**

|                           | Accuracy            | Sensitivity        | Specificity        | Pos Pred Value     | Neg Pred Value     | F1 Score           | AUC                |
|---------------------------|---------------------|--------------------|--------------------|--------------------|--------------------|--------------------|--------------------|
| Random Forest without PFO | 0.92 (0.89 to 0.95) | 0.94 (0.90 - 0.97) | 0.88 (0.82 - 0.94) | 0.94 (0.91 - 0.97) | 0.88 (0.80 - 0.93) | 0.94 (0.92 - 0.96) | 0.91 (0.89 - 0.94) |
| Random Forest with PFO    | 0.92 (0.89 to 0.94) | 0.94 (0.91 - 0.96) | 0.88 (0.80 - 0.93) | 0.94 (0.91 - 0.97) | 0.88 (0.82 - 0.93) | 0.94 (0.92 - 0.96) | 0.91 (0.87 - 0.94) |

A comparison of model performance shows that the removal of PFO had minimal effect on model performance.



## SUPPLEMENTAL FIGURES

Figure I. Process for feature extraction by identifying rules and regular expressions.

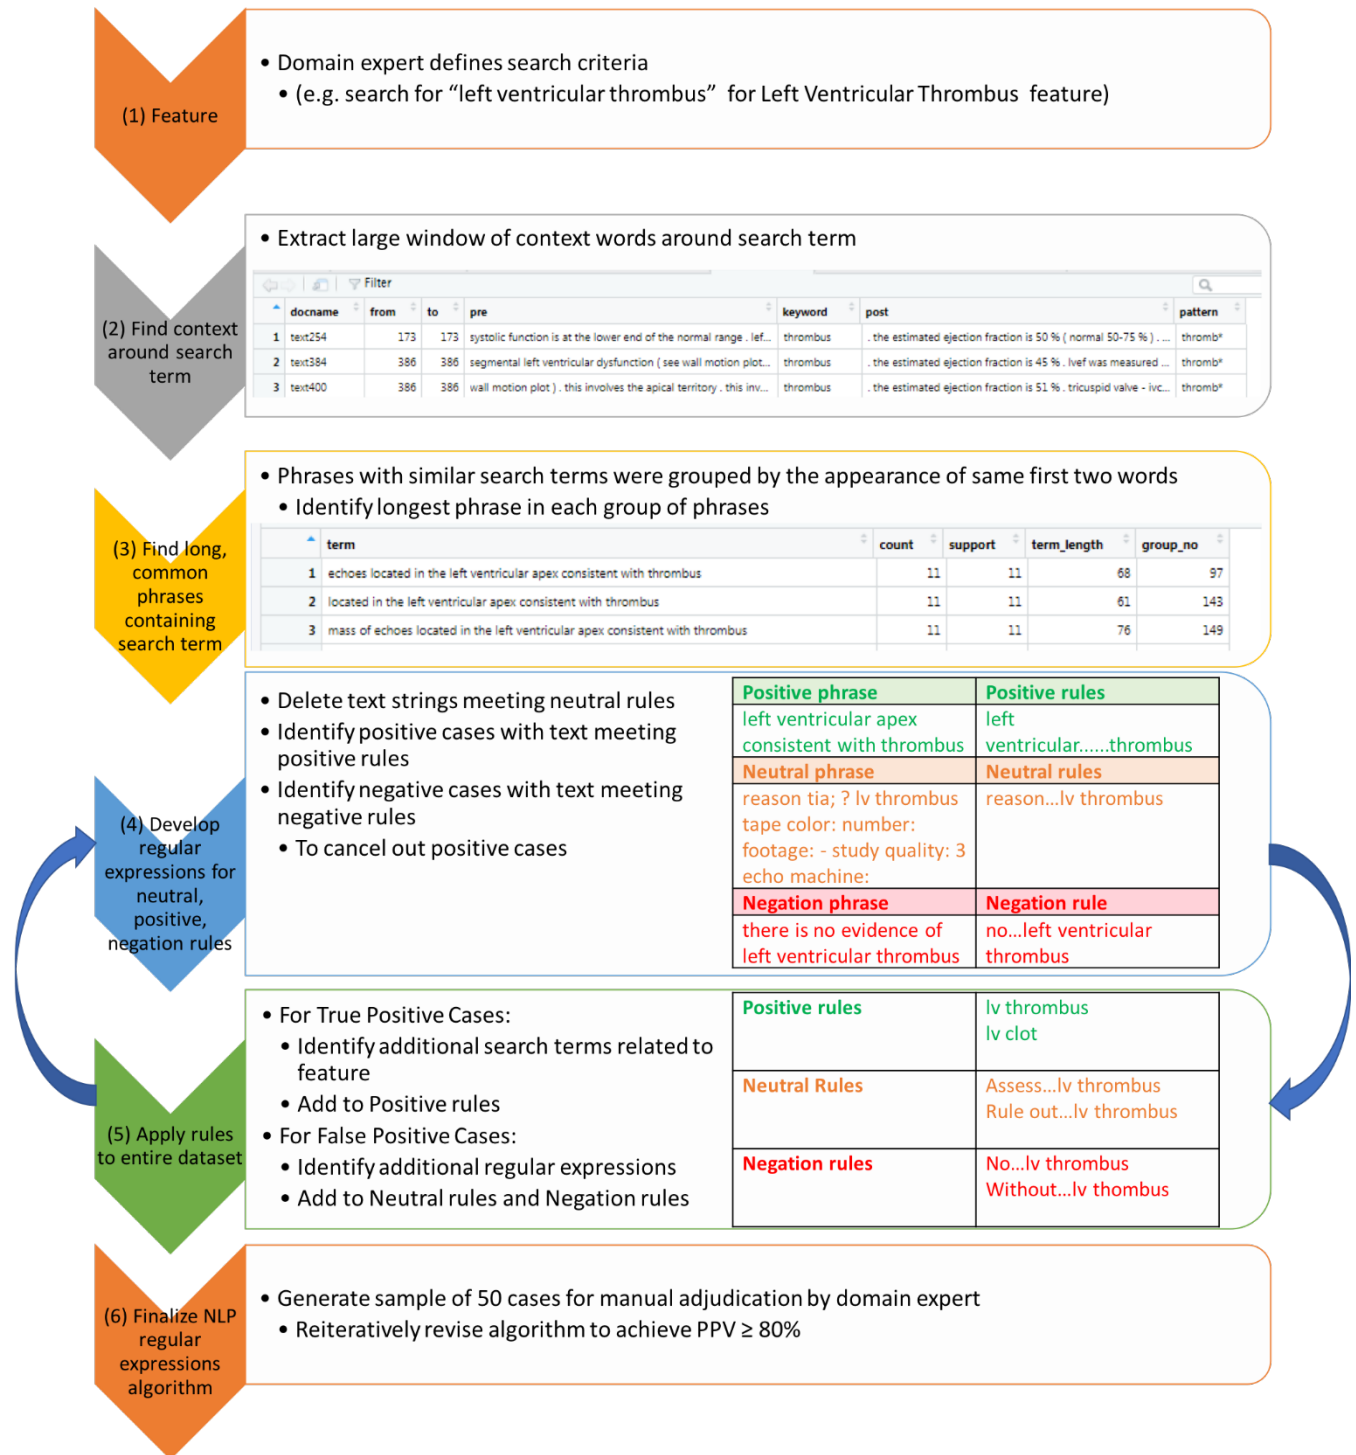

Domain expert clinicians defined the search criteria and search terms for a TOAST cardioembolic stroke feature. For each search term, a window of words was extracted to show the context around a certain keyword. The results were filtered to identify the presence of other keywords in the search term. Then similar phrases containing the search term were grouped together. Out of each group of phrases, the longest phrase was chosen to represent each group of phrases since longer phrases tend to contain more information. Then regular expressions were devised based on these phrases. Rules for identifying positive, neutral, and negative usages of the search term were developed, such that neutral usages could be removed, positive usages were flagged, and then cancelled out in the presence of negative usages. NLP algorithms based on rules and regular expressions were iteratively improved to include more rules and search terms. Our NLP algorithms were manually adjudicated by a domain expert and iteratively revised until  $PPV \geq 80\%$  was achieved.

**Figure II. Example R script for finding common long phrases containing search term.**

```
library(quanteda) # An R package for the quantitative analysis of textual
data
library(corpus) # An R package for term_statistics
library(dplyr) # An R package for data manipulation

### set working directory
setwd(...)

#### load transformed text file
load(file="docs.transf.RData")

#### quanteda - find phrases containing the keywords from entire corpus

docs.transf.quanteda <- quanteda::corpus(docs.transf)

doc.tokens.1 <- quanteda::tokens(docs.transf.quanteda, remove_numbers = F,
remove_punct = F,
  remove_symbols = T, remove_separators = T, ngrams = 1, skip = 0L,
  concatenator = " ")
#### find keywords in context around thrombus/thrombi
#### window of 30 was chosen to help capture long 1-2 sentences, rather than
paragraphs, around search term
contexts <- as.data.frame(quanteda::kwic(doc.tokens.1, pattern = "thromb*",
window=30, valuetype = "glob"))
#### search for phrases with other keywords in search term
contexts1 <- contexts %>% filter(grepl("left ventr",pre) | grepl("left
ventr",post) |
  grepl("left ventr",pre) | grepl("left ventr",post))
View(contexts1)

#### data manipulation for finding phrases containing search term in a
sentence
contexts2 <- contexts1 %>%
  mutate(new_pre = gsub("\\s*.*\\.\"", "",pre)) %>%
  mutate(new_post = gsub("\\s*\\.\"", "",post)) %>%
  filter(!grepl("left atr",new_pre), !grepl("left atr",new_post),
    !grepl("laa",new_pre), !grepl("laa",new_post),
    !grepl("appendage",new_pre), !grepl("appendage",new_post)) %>%
  select(new_pre, keyword, new_post) %>%
  mutate(text=paste(new_pre,keyword,new_post)) %>%
  select(text) %>%
  arrange(text)

#### estimate the best length(s) of phrases containing search terms
a1 <- c()
for(i in 1:40) {
  a <- corpus::term_stats(contexts2, ngrams = i, subset = (grepl("thromb",
term)), min_count = 2)
  a1 <- c(a1,nrow(a))
}
plot(a1,
```

```

  main="Length of Phrases Containing Keyword vs. Number of Phrases Occurring
  >=2",
  xlab = "Length of Phrases Containing Keyword",
  ylab = "Number of Phrases Occurring >=2")
which.max(a1)

#### from plot a1, we estimate the best length(s) of phrases are around 8 to
13
## a0 is a frequency table of the most common phrases of length 8 to 13
a0 <- corpus::term_stats(contexts2, ngrams = 8:13, subset = (grepl("thromb",
term)), min_count = 2, types = F)
View(a0)
## a1 is a frequency table of the most common phrases of length 8 to 13,
including columns for each word in the phrase
a <- corpus::term_stats(contexts2, ngrams = 8:13, subset = (grepl("thromb",
term)), min_count = 2, types = T)

#### compute phrase length
#### compute group number to group phrases by first two words
a2 <- a %>% mutate(term_length = nchar(str_squish(a$term))) %>%
  mutate(group_no = as.integer(factor(paste(type1,type2))))
View(a2)

#### group phrases by first two words (can change two),
#### find longest phrase in each group,
#### generate frequency table for long phrases to find most common long
phrases
a3 <- a2 %>% arrange(group_no,desc(term_length)) %>%
  group_by(group_no) %>%
  filter(row_number()==1) %>%
  select(-starts_with("type")) %>%
  arrange(desc(count))

View(a3)

#### visual inspection of contexts2 and a3
#### informs us to search for the following phrases
#### for positive rules:
# left ventricular thrombus
# "left ventr", "thrombus" in same sentence
# thrombus is present within the left ventricular apex
# left ventricular apex consistent with thrombus
# echoes within the ventricular apex c / w thrombus
# lv thrombus
# thrombus in the left ventricle

#### for negation rules:
# left ventricular thrombus can not be excluded
# no obvious evidence of left ventricular thrombus
# no obvious lv thrombus

```

docs.transf was a character vector wherein each element contains a cardiac report. Quanteda's kwic() function extracted the window of words around a keyword in a search term.

Data manipulation was applied to find the entire search term from the extraction. Then we graphed the number of unique phrases containing the keyword over the length of the phrase (n) containing the keyword, where the phrase occurs at least twice. The shortest phrase containing the keyword was the keyword itself, so the number of unique phrases, occurring at least twice, containing the keyword would be minimal (close to 1). The longest phrase containing the keyword would be a very long sentence with extraneous information; however, they do not occur more than once, so they would be omitted and the total number of unique phrases would be close to minimal. The option “min\_count” in the Corpus’s term\_stats() function excluded phrases with extraneous information such that such phrases would not occur more than once.

Between 1 and large n, there was an optimal length of phrase containing the keyword. At this length, there would be greater and more various information within each phrase, so that the number of unique phrases would be high. Each feature we developed had its own the optimal length of phrase. The graph was used to find the optimal length of phrase, for which there would be a peak of the number of unique phrases containing the keyword. Based on the peak in the graph, a range of lengths around the optimal length, say 8 to 13 in the above example, was used to compute the frequency table of the most common phrases of the range lengths (8 to 13).

While the most common phrases were found, many of the common phrases were very alike, since they may differ by a word or two. Our approach to this problem was to group the most common phrases by their first two words and then find the longest phrase within each grouping. Finally, we obtained a frequency table for long and popular phrases containing the search term. Based on this table, regular expressions were devised. Iteratively testing the algorithms helped identify additional positive, neutral, and negative rules.

### Figure III. Left ventricular ejection fraction (LVEF) regular expressions algorithm.

```
library(stringr)

#### LVEF code
pat <- "LV\\s?(\\w+\\s){0,4}EF\\s(\\w+\\s){0,4}\\d+|LV\\s?EF (\\w+\\s){0,4}is
(\\w+\\s){0,4}\\d+\\s?(-|to)\\s?\\d+|LV\\s?EF at
\\d+|(L?V?EF:*|Ejection\\s+fraction\\s+is|ejection\\s+fraction\\s+of|ejectio
n\\s+fraction\\s+is|ejection\\s+fraction\\s+is \\D* at|The calculated LVEF
\\D*is\\D*|LVEF is|LVEF estimated at|left\\s+ventricular function
is|ejection\\s+fraction\\s+is \\D* of)\\s+(\\S+)\\s*\\%"
b <- stringr::str_extract(corpus.txt, pat) # find phrases of "LVEF"
p <- gsub(" ", "", b, fixed=F)
d <- gsub(":", "", p, fixed=F)
e <- gsub(",", "", d, fixed=F)
f <- gsub("[a-z]+", "", e, fixed=F, ignore.case=T)
g <- gsub("%", "", f, fixed=F)
n = 5
h = substr(g, (nchar(g)+1)-n, nchar(g))
h <- trimws(g, "both")
i <- strsplit(h, "-")
j <- lapply(i, as.numeric)
k <- lapply(j, mean, na.rm=T) #take mean when \\1 group measurement or range
(i.e., "45-50%")
z <- as.numeric(unlist(k))
car$LVEF <- z
car$LVEF[which(car$LVEF == 0)] <- NA
sum(is.na(car$LVEF))

# if LVEF <= 40%, then hypokinetic_left_ventricular_segment present
ret <- as.numeric(z <= 40)
```

Previous research has developed a regular expressions algorithm for extracting left ventricular ejection fraction.<sup>1</sup> Extracted left ventricular ejection fraction quantities less than or equal to 40 qualifies as hypokinetic left ventricular segment (also called “reduced ejection fraction”).

**Figure IV. Total number of cardioembolic stroke features per patient.**

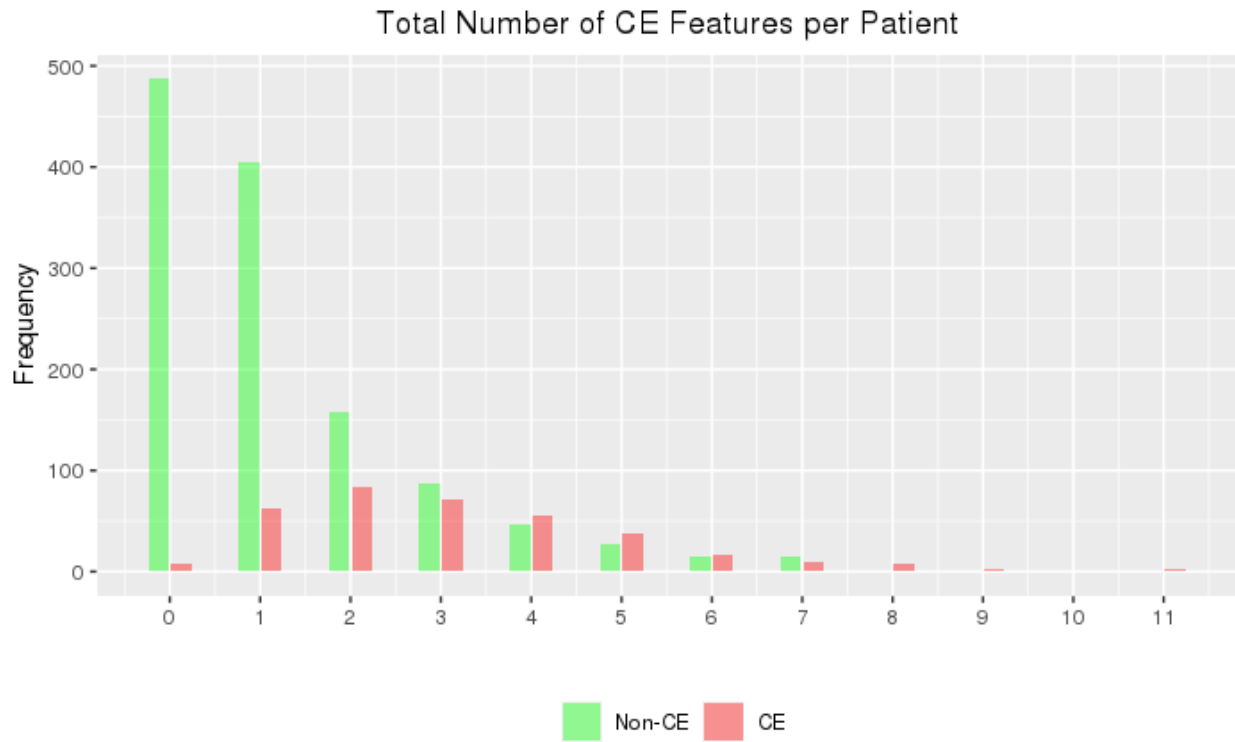

Histogram of the total number of TOAST cardioembolic stroke features per patient. The histogram shows that cardioembolic stroke patients tend to have a greater number of TOAST cardioembolic stroke features per patient meanwhile non-cardioembolic stroke patients tend to have 0-2 total number of TOAST cardioembolic stroke features.

**Figure V. Correlation plot of cardioembolic features.**

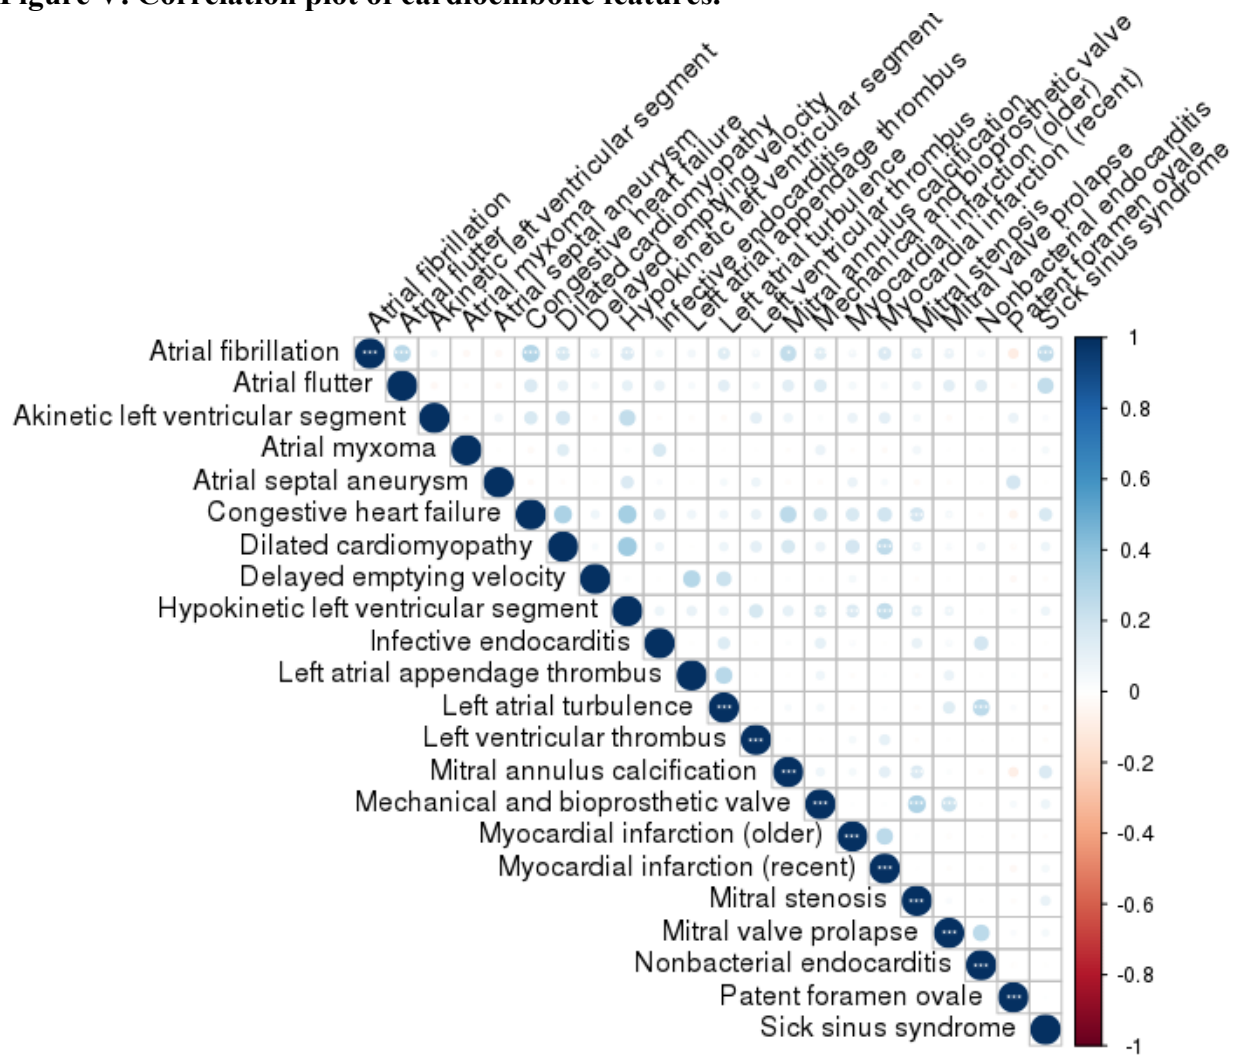

Correlation plot of TOAST cardioembolic features. Pairs of variables with correlation greater than 0.3 were Atrial fibrillation and Cardiac heart failure; Cardiac heart failure and Hypokinetic left ventricular segment; Dilated cardiomyopathy and Hypokinetic left ventricular segment; Mitral annulus calcification and Mitral stenosis; and Mechanical and bioprosthetic valve and Myocardial infarction (recent). Correlation matrix did not show that any pair of features having correlation greater than 0.4.
